# Supplementary material for: Alternatively Spliced BnaPAP2.A7 Isoforms Play Opposing Roles in Anthocyanin Biosynthesis of Brassica napus L
Source: Front Plant Sci. 2020 Aug 19;11:983. doi: 10.3389/fpls.2020.00983 (PMC7466728; doi:10.3389/fpls.2020.00983)
Supplement: Supplementary file 1 [file Table_1.docx]

**Alternative Splicing of *BnaPAP2.A7* Isoforms Play Opposing Roles in Anthocyanin Biosynthesis of *Brassica napus* L.**

Daozong Chen1, Yi Liu1, Qingdong Jin1, Jie Qiu1, Graham J King2, Jing Wang1, Xianhong Ge1*, Zaiyun Li1

1National Key Laboratory of Crop Genetic Improvement, National Center of Oil Crop Improvement (Wuhan), College of Plant Science and Technology, Huazhong Agricultural University, Wuhan 430070, People’s Republic of China

2Southern Cross Plant Science, Southern Cross University, Lismore, NSW 2480, Australia.


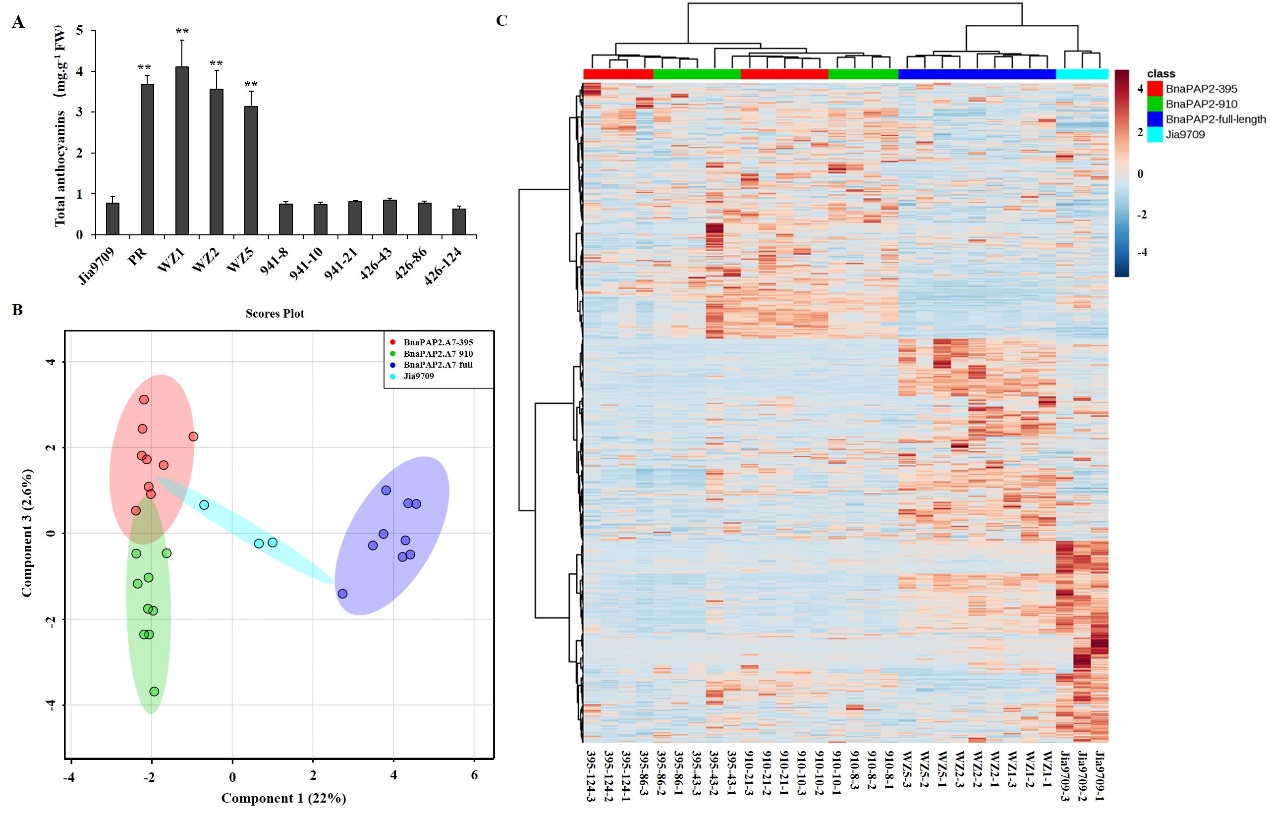


**Figure S1.** Analysis of anthocyanin content and related metabolites in transgenic lines (A)Analysis of anthocyanin content in leaves of transgenic lines containing full length PR *BnaPAP2. A7*, 395 and 910 isoform driven by the same 1.99kb promoter of *BnaPAP2. A7*. (B) Metabolites based principal component analysis (PCA) of controls, full-length BnaPAP2.A7, 395 and 910 transgenic lines.(C) Heat map of different plants based on the relative content of each metabolite.**, P < 0.01, one-way ANOVA test. Error bars represent the SD of three replicates.


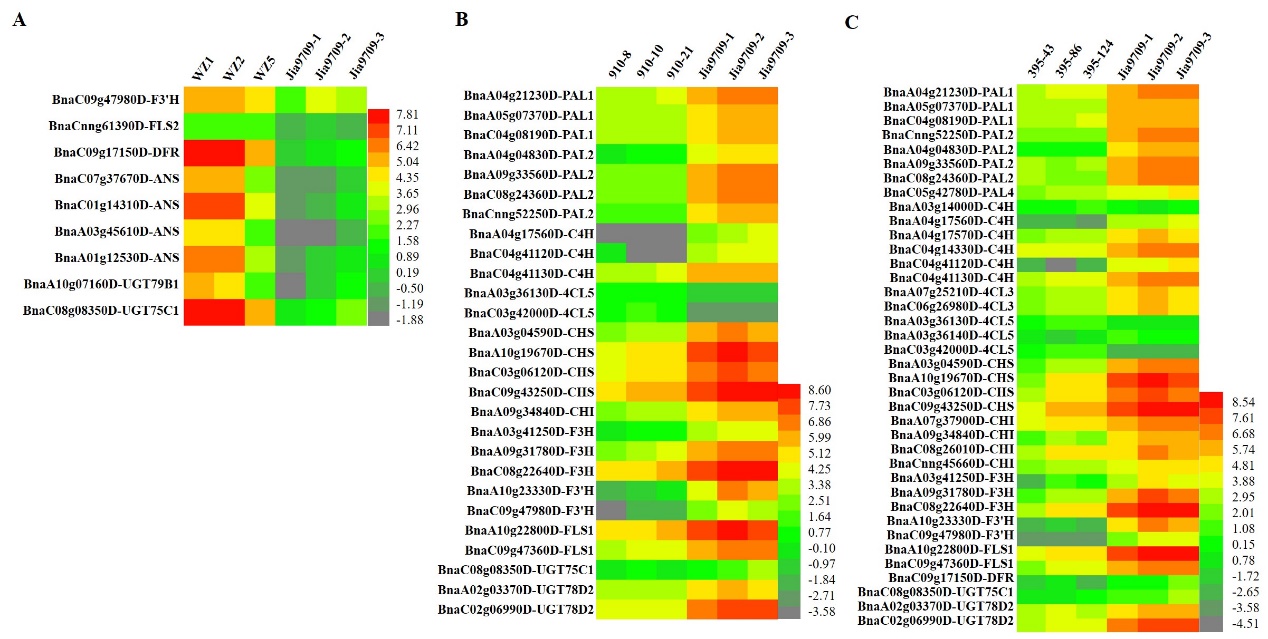


**Figure S2.** Heat map of DEGs involved in anthocyanin biosynthesis pathway

(A-C) DEGs involved in the anthocyanin metabolic pathway in full length *BnaPAP2.A7* (A), 910 (B) and 395 (C) transgenic lines. Note: only structure genes in anthocyanin biosynthesis pathwaywere presented here.

**Table S1. MBW components identified in *Brassica rapa, B. oleracea and B. napus***

| No. | Gene name | Gene ID | | | | |
| --- | --- | --- | --- | --- | --- | --- |
| ***Arabidopsis*** | ***B. rapa*** | ***B. oleracea*** | ***B. napus* A subgenome** | ***B. napus* C subgenome** |
| 1 | PAP1(MYB75) | AT1G56650 | BraA02g017040 | Bo00835s060 | BnaA02g35530D | BnaCnng28030D |
| 2 | MYB113 | AT1G66370 | BraA03g040840 | Bo3g081880 | BnaAnng41910D | BnaC03g74080D |
| 3 | MYB114 | AT1G66380 | BraA07g032100 | Bo6g099880 | BnaA07g25800D | BnaCnng69610D |
| 4 | PAP2(MYB90) | AT1G66390 |  | Bo6g100940 |  | BnaCnng17820D |
| 5 |  |  |  |  |  | BnaCnng75540D |
| 6 | EGL3 | AT1G63650 | BraA09g013280 | Bo9g029230 | BnaA09g11090D | BnaC09g11380D |
| 7 |  |  | BraA09g015130 | Bo9g035460 | BnaA09g12420D | BnaC09g12820D |
| 8 | TT8 | AT4G09820 | BraA09g028560 | Bo9g086910 | BnaA09g22810D | BnaC09g24870D |
| 9 | GL3 | AT5G41315 | BraA04g013890 | Bo4g141990 | BnaA04g11060D | BnaCnng33960D |
| 10 | TTG1 | AT5G24520 | BraA02g042110 | Bo7g096780 | BnaA02g32510D | BnaC02g41250D |
| 11 |  |  | BraA06g031870 |  |  | BnaC07g29950D |

**Table S2. Statistics of transformation of *BnaPAP2.A7-744*under different conditions**

| Gene construct/Combinations | Infection time (min） | Infection concentration (OD) | Total explants | Effective callus | Positive transgenic plants containing 744 isoform |
| --- | --- | --- | --- | --- | --- |
| BnaPAP2.A7-744 | 15 | 0.8 | 195 | 0 | 0 |
| BnaPAP2.A7-744 | 30 | 0.8 | 156 | 0 | 0 |
| BnaPAP2.A7-744 | 60 | 0.8 | 29 | 0 | 0 |
| BnaPAP2.A7-744 | 15 | 1.6 | 138 | 0 | 0 |
| BnaPAP2.A7-744 | 15 | 2.4 | 343 | 0 | 0 |
| BnaPAP2.A7-395 | 15 | 0.8 | 726 | 640 | 0 |
| BnaPAP2.A7-744 | 15 | 0.8 | 472 | 0 | 0 |
| BnaPAP2.A7-910 | 15 | 0.8 | 382 | 360 | 0 |
| No Kana-BnaPAP2.A7-744 | 15 | 0.8 | 375 | 366 | 0 |
| BnaPAP2.A7-395 & BnaPAP2.A7-744 | 15 | 0.8 | 519 | 432 | 0 |
| BnaPAP2.A7-744 & BnaPAP2.A7-910 | 15 | 0.8 | 707 | 564 | 0 |
| BnaPAP2.A7-395 & BnaPAP2.A7-744& BnaPAP2.A7-910 | 15 | 0.8 | 885 | 603 | 0 |

**Table S3. Sequences of all primers used in this study**

| Name | Primer sequence (5’―3’) |
| --- | --- |
| Primers for plasmid construction | |
| PAP2.A7-PF | TCATTTTACACATCATCTTCTACTACA |
| PAP2.A7-gR | ACTAATCAAGTTCCAGTTTCTCCA |
| PAP2.A7-CDS-PF | ATGGAGGGTTCGTCCCAAGGG |
| PAP2.A7-CDS-PR | ACTAATCAAGTTCCAGTTTCTCCA |
| PAP2.A7-KpnI-PF | TCGATCTGGTACCTCATTTTACACATCATCTTCTACTACA |
| PAP2.A7-BamHI-gR | AGTACAGGATCCACTAATCAAGTTCCAGTTTCTCCA |
| PAP2.A7-BamHI-PR | AGTACAGGATCC GGACCAGCTATAATTTTAGAAGTA |
| PAP2.A7-BamHI-PF | TAAATTGGTACCATGGAGGGTTCGTCCCAAGGG |
| PAP2.A7-BstEII-PR | CAGTCAGGTCACCACTAATCAAGTTCCAGTTTCTCCA |
| Primers for yeast two hybrid | |
| AtPAP2-F | ATGGAGGGTTCGTCCAAAGGG |
| AtPAP2-R | CTAATCAAGTTCAACAGTCTCTC |
| AtPAP2-EcoRI-F | AGTGCAGAATTCATGGAGGGTTCGTCCAAAGGG |
| AtPAP2-BamHI-R | AGTACAGGATCCCTAATCAAGTTCAACAGTCTCTC |
| SG -EcoRI-F | AGTGCAGAATTCATGGAGGGTTCGTCCCAAGGG |
| SG-BamHI-R | AGTACAGGATCCTCAAGTTCCAGTTTCTCCATCCAA |
| At-TT8-F2 | GAGAGAGAGCTACCACGTTTT |
| At-TT8-R2 | TGGCATCAATAAAGTTAGGGT |
| AtTT8-EcoRI-F | AGTGCAGAATTCATGGATGAATCAAGTATTATT |
| AtTT8-BamHI-R | AGTACAGGATCCCTATAGATTAGTATCATGTAT |
| Primers for subcellular localization | |
| A7-Eco105I-PF | TAAATTTACGTACCATGGAGGGTTCGTCCCAAG |
| A7-SmiI-PR | CGCCGGTAAATTTAACTAATCAAGTTCCAGTTTCTCCA |
| AT-BamHI-PF | AGTACAGGATCCCTTTTATATTAATTTTTCTTTGGTCC |
| AT-SmaI-PR | AGTACACCCGGGCTTAAACAAACGGTGAGAAAC |
| Primers for qRT-PCR | |
| Bnaactin3-eF | TCCATCCATCGTCCACAG |
| Bnaactin3-eR | GCATCATCACAAGCATCCTT |
| RTPAP2A7-3-F | GCATTGATAAGTATGGAGAAGG |
| RTPAP2A7-426-R5 | CCTATTCTGTTTCCTAAAAGC |
| RTPAP2A7-775-R3 | GACCACCTGTTTCCTAAAAGC |
| RTPAP2A7-941-R | GGGATATATTTGACTTAGTAATGG |
| PAL-A04-RT1F | GTCTTCCTTCGAACCTAACC |
| PAL-A04-RT1R | TGAGTATGTCTACAGCTTCTGAT |
| C4H-C04-RT1F | CTATTGGTAGGTTGGTTCAAAACTTT |
| C4H-C04-RT1R | TGCAGAAATCATATTTTCTTGTCTATCTT |
| CHS-A10-RT1F | TCCTTGACGAGGTTGAGAAG |
| CHS-A10-RT1R | CAAGACCACTGTCTCTACG |
| F3'H-A10-RT1F | TGCACGGATTTGAATGGGAACT |
| F3'H-A10-RT1R | GCTTGTCATGCAAGCTAAGTTAG |
| DFR-C09-RT1F | TGTTCGCGATCCTGGAAATTTGA |
| DFR-C09-RT1R | CTTTGATTCAAAATCCATGGGAGTA |
| ANS-A01-RT1F | TGTTTTGTGAACCACCAAAGGAT |
| ANS-A01-RT1R | CTCAAACATAGAGTTTCAGACTCA |
| MYB4-C03-RT1F | ACAACACCATTAACATATCTTTCACTAA |
| MYB4-C03-RT1R | CTAAACTGCACTTGAAACAACGCT |
| MYBL2-A02-RT1F | AGTTTGTGGCCTTCAAGAATCTAA |
| MYBL2-A02-RT1R | TACAGATAAATACACCATTTTTCA |
